# Supplementary material
Source: Springer Nature journal article supplement (https://www.springermedizin.de/resource/supplementary/13633_2013_337_MOESM3_ESM.pdf/9596164)

# Diagnostic Algorithm and Management for Patients with Confirmed XY Gonadal Dysgenesis

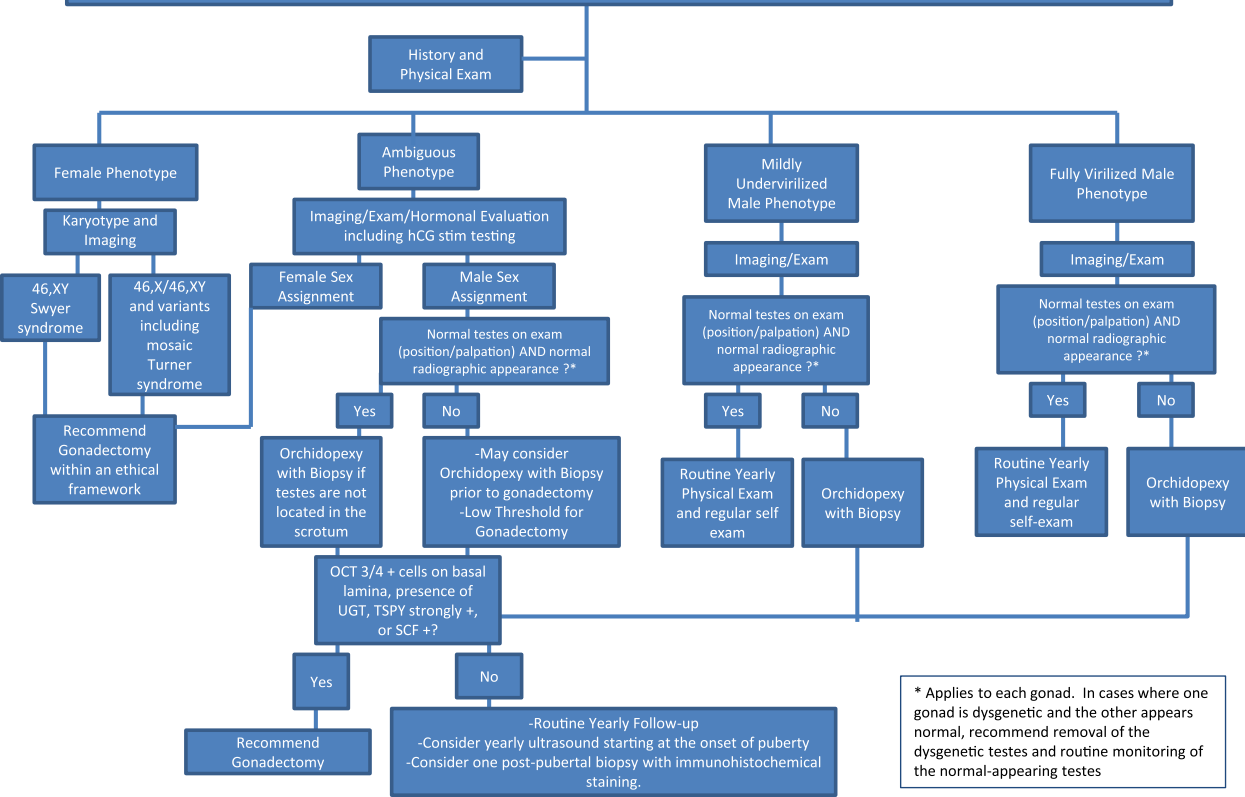

Supplement: MOESM3 [file 9596164]
